# Supplementary material
Source: publisher site journal article supplement (https://www.dovepress.com/article/132962)
Supplement: Supplementary file 1 [file get_supplementary_file.php]

S1 Table. Selected studies and methodology of the different clinical trials.

|                                                    | Design     | Treatment arms                                                                                       | Duration | Primary endpoint        | N    |
|----------------------------------------------------|------------|------------------------------------------------------------------------------------------------------|----------|-------------------------|------|
| Indacaterol/glycopyrronium                         |            |                                                                                                      |          |                         |      |
| Bateman ED, et al. ERJ<br>2013 [1]<br>SHINE        | RCT        | IND/GLY 110/50<br>Indacaterol 150<br>Glycopyrronium 50,<br>Tiotropium 18 (open-<br>label)<br>Placebo | 26 weeks | Trough FEV <sub>1</sub> | 2144 |
| Dahl R, et al. Respir Med<br>2013 [2]<br>ENLIGHTEN | RCT        | IND/GLY 110/50<br>Placebo                                                                            | 52 weeks | Safety                  | 339  |
| Mahler D, et al. Eur Respir<br>J 2013 [3]<br>BLAZE | Cross-over | IND/GLY 110/50<br>Tiotropium (blinded)<br>Placebo                                                    | 6 weeks  | Dyspnea (TDI)           | 247  |

|                                                           | Design     | Treatment arms                                                 | Duration | Primary endpoint                                                     | N    |
|-----------------------------------------------------------|------------|----------------------------------------------------------------|----------|----------------------------------------------------------------------|------|
| Wedzicha J, et al. Lancet<br>Respir Med 2013 [4]<br>SPARK | RCT        | IND/GLY 110/50<br>Glycopyrronium 50<br>Tiotropium (open label) | 64 weeks | Exacerbations                                                        | 2224 |
| Beeh K-M, et al. Respir<br>Med 2014 [5]<br>BRIGHT         | Cross-over | IND/GLY 110/50<br>Tiotropium (partial<br>blinded)<br>Placebo   | 3 weeks  | Endurance                                                            | 85   |
| Larbig M, et al. APRS<br>Congress 2015 [6]<br>RADIATE     | RCT        | IND/GLY 110/50<br>Tiotropium 18<br>Placebo                     | 52 weeks | Trough FEV <sub>1</sub><br>SGRQ<br>Exacerbations                     | 1216 |
| Watz H, et al. BMC Pulm<br>Med 2016 [7]<br>MOVE           | Cross-over | IND/GLY 110/50<br>Placebo                                      | 3 weeks  | Peak IC<br>Average daily activity-<br>related energy<br>expenditure. | 194  |

|                                       | Design | Treatment arms                                                                    | Duration | Primary endpoint                                                 | N    |
|---------------------------------------|--------|-----------------------------------------------------------------------------------|----------|------------------------------------------------------------------|------|
| <b>Acclidinium/formoterol</b>         |        |                                                                                   |          |                                                                  |      |
| D'Urzo D, et al. Respir Res 2014 [8]  | RCT    | ACLI/FOR 400/12,<br>ACLI/FOR 400/6<br>Acclidinium 400<br>Formoterol 12<br>Placebo | 24 weeks | Morning post-dose<br>FEV <sub>1</sub><br>Trough FEV <sub>1</sub> | 1692 |
| Singh D, et al. BMC Pulm Med 2014 [9] | RCT    | ACLI/FOR 400/12,<br>ACLI/FOR 400/6<br>Acclidinium 400<br>Formoterol 12<br>Placebo | 24 weeks | Morning post-dose<br>FEV <sub>1</sub><br>Trough FEV <sub>1</sub> | 1729 |

|                                         | Design | Treatment arms                                                                   | Duration | Primary endpoint                      | N    |
|-----------------------------------------|--------|----------------------------------------------------------------------------------|----------|---------------------------------------|------|
| Bateman ED, et al. Respir Res 2015 [10] | RCT    | ACLI/FOR 400/12,<br>ACLI/FOR 400/6                                               | 24 weeks | Morning post-dose<br>FEV <sub>1</sub> | 3421 |
| AUGMENT COPD +<br>ACLIFORM              |        | Aclidinium 400<br>Formoterol 12<br>Placebo                                       |          | Trough FEV <sub>1</sub>               |      |
| Donohue JF, et al. Respir Med 2016 [11] | RCT    | ACLI/FOR 400/12<br>Formoterol 12                                                 | 52 weeks | Safety                                | 590  |
| D'Urzo D, et al. ATS Poster 2014 [12]   | RCT    | ACLI/FOR 400/12,<br>ACLI/FOR 400/6<br>Aclidinium 400<br>Formoterol 12<br>Placebo | 52 weeks | Not defined                           | 1668 |

|                                                                | Design | Treatment arms                                                         | Duration | Primary endpoint        | N    |
|----------------------------------------------------------------|--------|------------------------------------------------------------------------|----------|-------------------------|------|
| Umeclidinium/vilanterol                                        |        |                                                                        |          |                         |      |
| Donohue JF, et al. Respir Med 2013 [13]                        | RCT    | UMEC/VIL 62.5/25<br>Umeclidinium 62.5<br>Vilanterol 25<br>Placebo      | 24 weeks | Trough FEV <sub>1</sub> | 1532 |
| Decramer M, et al. Lancet Respir Med 2014 (Study 1 and 2) [14] | RCT    | UMEC/VIL 125/25,<br>UMEC/VIL 62.5/25<br>Tiotropium 18<br>Vilanterol 25 | 24 weeks | Trough FEV <sub>1</sub> | 1718 |
| Maleki-Yazdi MR, et al. Respir Med 2014 [15]                   | RCT    | UMEC/VIL 62.5/25<br>Tiotropium 18                                      | 24 weeks | Trough FEV <sub>1</sub> | 905  |

|                                                                         | Design     | Treatment arms                                                                                            | Duration | Primary endpoint                     | N   |
|-------------------------------------------------------------------------|------------|-----------------------------------------------------------------------------------------------------------|----------|--------------------------------------|-----|
| Maltais F, et al. Ther Adv<br>Respir Dis 2014<br>(Study 417 & 418) [16] | Cross-over | UMEC/VIL 125/25,<br>UMEC/VIL 62.5/25<br>Vilanterol 25<br>Umeclidinium 125<br>Umeclidinium 62.5<br>Placebo | 12 weeks | Endurance<br>Trough FEV <sub>1</sub> | 655 |
| Zheng J, et al. Int J COPD<br>2015 [17]                                 | RCT        | UMEC/VIL 125/25<br>UMEC/VIL 62.5/25<br>Placebo                                                            | 24 weeks | Trough FEV <sub>1</sub>              | 580 |
| Siler TN, et al. Int J COPD<br>2016 [18]                                | RCT        | UMEC/VIL 62.5/25<br>Placebo                                                                               | 12 weeks | SGRQ                                 | 496 |

|                                                | Design     | Treatment arms                                                                  | Duration | Primary endpoint                                                       | N    |
|------------------------------------------------|------------|---------------------------------------------------------------------------------|----------|------------------------------------------------------------------------|------|
| Tiotropium/olodaterol                          |            |                                                                                 |          |                                                                        |      |
| Beeh K-M, et al. Pulm Pharmacol Ther 2015 [19] | Cross-over | TIO/OLO 2,5/5;<br>TIO/OLO 5/5<br>Tiotropium 2,5 or 5<br>Olodaterol 5<br>Placebo | 6 weeks  | FEV <sub>1</sub> AUC <sub>0-24</sub>                                   | 219  |
| Buhl R, et al. Eur Respir J 2015 [20]          | RCT        | TIO/OLO 2,5/5;<br>TIO/OLO 5/5<br>Tiotropium 2,5 or 5<br>Olodaterol 5            | 52 weeks | FEV <sub>1</sub> AUC <sub>0-3</sub><br>Trough FEV <sub>1</sub><br>SGRQ | 5162 |
| Singh D, et al. Respir Med 2015 [21]           | RCT        | TIO/OLO 2,5/5;<br>TIO/OLO 5/5<br>Tiotropium 5<br>Placebo                        | 12 weeks | FEV <sub>1</sub> AUC <sub>0-3</sub><br>Trough FEV <sub>1</sub><br>SGRQ | 1621 |

|                                                 | Design     | Treatment arms                          | Duration | Primary endpoint        | N   |
|-------------------------------------------------|------------|-----------------------------------------|----------|-------------------------|-----|
| Guo L, et al. Can Thorac Soc Congress 2015 [22] | RCT        | TIO/OLO 2,5/5;<br>TIO/OLO 5/5           | 12 weeks | Endurance               | 404 |
| TORRACTO                                        |            | Placebo                                 |          |                         |     |
| O'Donnell D, et al. ATS Congress 2015 [23]      | Cross-over | TIO/OLO 2,5/5;<br>TIO/OLO 5/5           | 6 weeks  | IC at rest<br>Endurance | 586 |
| MORACTO 1 and 2                                 |            | Tiotropium 5<br>Olodaterol 5<br>Placebo |          |                         |     |

Abbreviations: ACLI/FOR, aclidinium/formoterol; AUC, area under the curve; FEV<sub>1</sub>, forced expiratory volume in one second;

IND/GLY, indacaterol/glycopyrronium; SGRQ, St. George's Respiratory Questionnaire; TDI, transitional dyspnea index; TIO/OLO,

tiotropium/olodaterol; UMEC/VIL, umeclidinium/vilanterol



## References

1. Bateman ED, Ferguson GT, Barnes N, Gallagher N, Green Y, Henley M, et al. Dual bronchodilation with QVA149 versus single bronchodilator therapy: the SHINE study. *The European respiratory journal : official journal of the European Society for Clinical Respiratory Physiology*. 2013;42(6):1484-94. doi: 10.1183/09031936.00200212. PubMed PMID: 23722616; PubMed Central PMCID: PMC3844137.
2. Dahl R, Chapman KR, Rudolf M, Mehta R, Kho P, Alagappan VK, et al. Safety and efficacy of dual bronchodilation with QVA149 in COPD patients: the ENLIGHTEN study. *Respiratory medicine*. 2013;107(10):1558-67. doi: 10.1016/j.rmed.2013.05.016. PubMed PMID: 23867808.
3. Mahler DA, Decramer M, D'Urzo A, Worth H, White T, Alagappan VK, et al. Dual bronchodilation with QVA149 reduces patient-reported dyspnoea in COPD: the BLAZE study. *The European respiratory journal : official journal of the European Society for Clinical Respiratory Physiology*. 2014;43(6):1599-609. doi: 10.1183/09031936.00124013. PubMed PMID: 24176997.
4. Wedzicha JA, Decramer M, Ficker JH, Niewoehner DE, Sandstrom T, Taylor AF, et al. Analysis of chronic obstructive pulmonary disease exacerbations with the dual bronchodilator QVA149 compared with glycopyrronium and tiotropium (SPARK): a randomised, double-blind, parallel-group study. *The lancet Respiratory medicine*. 2013;1(3):199-209. doi: 10.1016/S2213-2600(13)70052-3. PubMed PMID: 24429126.
5. Beeh KM, Korn S, Beier J, Jadayel D, Henley M, D'Andrea P, et al. Effect of QVA149 on lung volumes and exercise tolerance in COPD patients: the BRIGHT study. *Respiratory medicine*. 2014;108(4):584-92. doi: 10.1016/j.rmed.2014.01.006. PubMed PMID: 24534204.
6. Larbig M, FowlerTaylor A, Maitra S, Schubert-Tennigkeit A, Banerji D. Efficacy and safety of IND/GLY (indacaterol/glycopyrronium) versus placebo and tiotropium in symptomatic patients with moderate-to-severe COPD: the 52-week RADIATE study. *Asian Pacific Society of Respirology (APSR) Congress, 2015*.
7. Watz H, Mailander C, Baier M, Kirsten A. Effects of indacaterol/glycopyrronium (QVA149) on lung hyperinflation and physical activity in patients with moderate to severe COPD: a randomised, placebo-controlled, crossover study (The MOVE Study). *BMC pulmonary medicine*. 2016;16(1):95. doi: 10.1186/s12890-016-0256-7. PubMed PMID: 27301417; PubMed Central PMCID: PMC4908762.
8. D'Urzo AD, Rennard SI, Kerwin EM, Mergel V, Leselbaum AR, Caracta CF, et al. Efficacy and safety of fixed-dose combinations of aclidinium bromide/formoterol fumarate: the 24-week, randomized, placebo-controlled AUGMENT COPD study. *Respiratory research*. 2014;15:123. doi: 10.1186/s12931-014-0123-0. PubMed PMID: 25756831; PubMed Central PMCID: PMC4213545.
9. Singh D, Jones PW, Bateman ED, Korn S, Serra C, Molins E, et al. Efficacy and safety of aclidinium bromide/formoterol fumarate fixed-dose combinations compared with individual components and placebo in patients with COPD (ACLIFORM-COPD): a

- multicentre, randomised study. *BMC pulmonary medicine*. 2014;14:178. doi: 10.1186/1471-2466-14-178. PubMed PMID: 25404569; PubMed Central PMCID: PMC4273456.
10. Bateman ED, Chapman KR, Singh D, D'Urzo AD, Molins E, Leselbaum A, et al. Acclidinium bromide and formoterol fumarate as a fixed-dose combination in COPD: pooled analysis of symptoms and exacerbations from two six-month, multicentre, randomised studies (ACLIFORM and AUGMENT). *Respiratory research*. 2015;16:92. doi: 10.1186/s12931-015-0250-2. PubMed PMID: 26233481; PubMed Central PMCID: PMC4531806.
  11. Donohue JF, Soong W, Wu X, Shrestha P, Lei A. Long-term safety of aclidinium bromide/formoterol fumarate fixed-dose combination: Results of a randomized 1-year trial in patients with COPD. *Respiratory medicine*. 2016;116:41-8. doi: 10.1016/j.rmed.2016.05.007. PubMed PMID: 27296819.
  12. D'Urzo A, Rennard S, Kerwin E, He T, Leselbaum A, Caracta C. Efficacy of Fixed-Dose Combination Acclidinium Bromide/Formoterol Fumarate on Bronchodilation Over 1 Year: AUGMENT COPD Extension Trial in Patients With Moderate to Severe COPD. *American Thoracic Society International Conference*, 2014.
  13. Donohue JF, Maleki-Yazdi MR, Kilbride S, Mehta R, Kalberg C, Church A. Efficacy and safety of once-daily umeclidinium/vilanterol 62.5/25 mcg in COPD. *Respiratory medicine*. 2013;107(10):1538-46. doi: 10.1016/j.rmed.2013.06.001. PubMed PMID: 23830094.
  14. Decramer M, Anzueto A, Kerwin E, Kaelin T, Richard N, Crater G, et al. Efficacy and safety of umeclidinium plus vilanterol versus tiotropium, vilanterol, or umeclidinium monotherapies over 24 weeks in patients with chronic obstructive pulmonary disease: results from two multicentre, blinded, randomised controlled trials. *The lancet Respiratory medicine*. 2014;2(6):472-86. Epub 2014/05/20. doi: 10.1016/s2213-2600(14)70065-7. PubMed PMID: 24835833.
  15. Maleki-Yazdi MR, Kaelin T, Richard N, Zvarich M, Church A. Efficacy and safety of umeclidinium/vilanterol 62.5/25 mcg and tiotropium 18 mcg in chronic obstructive pulmonary disease: results of a 24-week, randomized, controlled trial. *Respiratory medicine*. 2014;108(12):1752-60. Epub 2014/12/03. doi: 10.1016/j.rmed.2014.10.002. PubMed PMID: 25458157.
  16. Maltais F, Singh S, Donald AC, Crater G, Church A, Goh AH, et al. Effects of a combination of umeclidinium/vilanterol on exercise endurance in patients with chronic obstructive pulmonary disease: two randomized, double-blind clinical trials. *Therapeutic advances in respiratory disease*. 2014;8(6):169-81. doi: 10.1177/1753465814559209. PubMed PMID: 25452426.
  17. Zheng J, Zhong N, Newlands A, Church A, Goh AH. Efficacy and safety of once-daily inhaled umeclidinium/vilanterol in Asian patients with COPD: results from a randomized, placebo-controlled study. *International journal of chronic obstructive pulmonary disease*. 2015;10:1753-67. doi: 10.2147/COPD.S81053. PubMed PMID: 26366068; PubMed Central PMCID: PMC4562726.
  18. Siler TM, Donald AC, O'Dell D, Church A, Fahy WA. A randomized, parallel-group study to evaluate the efficacy of umeclidinium/vilanterol 62.5/25 mcg on health-related quality of life in patients with COPD. *International journal of chronic obstructive pulmonary disease*. 2016;11:971-9. doi: 10.2147/COPD.S102962. PubMed PMID: 27274218; PubMed Central PMCID: PMC4869636.

19. Beeh KM, Westerman J, Kirsten AM, Hebert J, Gronke L, Hamilton A, et al. The 24-h lung-function profile of once-daily tiotropium and olodaterol fixed-dose combination in chronic obstructive pulmonary disease. *Pulmonary pharmacology & therapeutics*. 2015;32:53-9. doi: 10.1016/j.pupt.2015.04.002. PubMed PMID: 25956072.
20. Buhl R, Maltais F, Abrahams R, Bjermer L, Derom E, Ferguson G, et al. Tiotropium and olodaterol fixed-dose combination versus mono-components in COPD (GOLD 2-4). *The European respiratory journal : official journal of the European Society for Clinical Respiratory Physiology*. 2015;45(4):969-79. doi: 10.1183/09031936.00136014. PubMed PMID: 25573406; PubMed Central PMCID: PMC4391658.
21. Singh D, Ferguson GT, Bolitschek J, Gronke L, Hallmann C, Bennett N, et al. Tiotropium + olodaterol shows clinically meaningful improvements in quality of life. *Respiratory medicine*. 2015;109(10):1312-9. Epub 2015/09/01. doi: 10.1016/j.rmed.2015.08.002. PubMed PMID: 26320402.
22. Guo L, Maltais F, Galdiz Iturri JB, Kirsten A, Singh D, Hamilton A, Tetzlaff K, Zhao Y, Casaburi R. Effects of 12 weeks of once-daily tiotropium and olodaterol fixed-dose combination on exercise endurance in patients with COPD. 8th Annual Canadian Respiratory Conference, 2015.
23. O'Donnell D, Casaburi R, De Sousa D, Xue W, Frith P, Hamilton A, Kirsten A, Maltais F. Effects of 6 weeks' treatment with once-daily tiotropium and olodaterol on inspiratory capacity and exercise capacity in patients with COPD: the MORACTO studies. 111th International Conference of the American Thoracic Society, 2015.

S2 Table. Patients' characteristics included in the different clinical trials.<sup>a</sup>

|                                                        | Age<br>(years) | Males<br>(%) | Smokers<br>(%) | ICS<br>(%) | FEV <sub>1</sub><br>(mL) | FEV <sub>1</sub><br>(%) | BDT   | Reversible<br>(%) | Exacerb $\geq 2$<br>(%) |
|--------------------------------------------------------|----------------|--------------|----------------|------------|--------------------------|-------------------------|-------|-------------------|-------------------------|
| Indacaterol/glycopyrronium                             |                |              |                |            |                          |                         |       |                   |                         |
| Bateman ED, et al. ERJ 2013 [1]<br>SHINE               | 64.0           | 76.4         | 40.5           | 56.5       | 1,500                    | 55.7                    | 20.4% | NA                | 5.9                     |
| Dahl R, et al. Respir Med 2013 [2]<br>ENLIGHTEN        | 62.5           | 77.3         | 45.3           | 45.8       | 1,620                    | 56.3                    | 15.7% | NA                | 6.7                     |
| Mahler D, et al. Eur Respir J 2013 [3]<br>BLAZE        | 62.8           | 70.3         | 45.5           | 54.9       | 1,600                    | 56.1                    | 20.6% | NA                | 6.9                     |
| Wedzicha J, et al. Lancet Respir Med 2013 [4]<br>SPARK | 63.1           | 76.0         | 38.0           | 75.0       | 1,040                    | 37.0                    | 17.2% | NA                | 22.0                    |
| Beeh K-M, et al. Respir Med 2014 [5]<br>BRIGHT         | 62.1           | 63.1         | 53.6           | 31.0       | 1,600                    | 55.9                    | 22.6% | NA                | 2.4                     |

|                                                                   | Age<br>(years) | Males<br>(%) | Smokers<br>(%) | ICS<br>(%) | FEV <sub>1</sub><br>(mL) | FEV <sub>1</sub><br>(%) | BDT   | Reversible<br>(%) | Exacerb $\geq 2$<br>(%) |
|-------------------------------------------------------------------|----------------|--------------|----------------|------------|--------------------------|-------------------------|-------|-------------------|-------------------------|
| Larbig M, et al. APRS Congress 2015 <sup>6</sup><br>RADIATE       | 64.6           | 70.8         | 42.8           | 57.5       | 1,500                    | 56.4                    | 18.4% | NA                | NA                      |
| Watz H, et al. BMC Pulm Med 2016 [6]<br>MOVE                      | 62.8           | 65.5         | 56.7           | NA         | NA                       | 61.6                    | NA    | NA                | NA                      |
| Aclidinium/formoterol                                             |                |              |                |            |                          |                         |       |                   |                         |
| D'Urzo D, et al. Respir Res 2014 [7]<br>AUGMENT COPD              | 64.2           | 50.1         | 51.6           | NA         | NA                       | 53.2                    | 17.2% | NA                | NA                      |
| Singh D, et al. BMC Pulm Med 2014 [8]<br>ACLIFORM                 | 62.7           | 67.8         | 47.0           | 22.1       | 1,420                    | 54.6                    | NA    | 34.8              | NA                      |
| Bateman ED, et al. Respir Res 2015 [9]<br>AUGMENT COPD + ACLIFORM | 63.4           | 59.6         | 49.2           | 15.8       | 1400                     | 53.9                    | NA    | NA                | NA                      |
| Donohue JF, et al. Respir Med 2016 [10]                           | 63.9           | 55.1         | 46.9           | 35.2       | NA                       | 51.8                    | NA    | NA                | NA                      |
| D'Urzo D, et al. ATS Poster 2014 <sup>9</sup>                     | 64.2           | 20.1         | 51.6           | NA         | 1340                     | 53.2                    | NA    | 43.3              | NA                      |

|                                                           | Age<br>(years) | Males<br>(%) | Smokers<br>(%) | ICS<br>(%) | FEV <sub>1</sub><br>(mL) | FEV <sub>1</sub><br>(%) | BDT    | Reversible<br>(%) | Exacerb $\geq 2$<br>(%) |
|-----------------------------------------------------------|----------------|--------------|----------------|------------|--------------------------|-------------------------|--------|-------------------|-------------------------|
| Umeclidinium/vilanterol                                   |                |              |                |            |                          |                         |        |                   |                         |
| Donohue JF, et al. Respir Med 2013 [11]                   | 63.1           | 74           | 49.0           | 51.0       | NA                       | 47.8                    | 13.9%  | 31.0              | NA                      |
| Decramer M, et al. Lancet Respir Med 2014<br>(Study 1)    | 63.0           | 70           | 46             | 44         | NA                       | 48                      | 12.4%  | NA                | NA                      |
| Decramer M, et al. Lancet Respir Med 2014<br>(Study 2)    | 65.0           | 65           | 42             | 47         | NA                       | 47.7                    | 14.9%  | NA                | NA                      |
| Maleki-Yazdi MR, et al. Respir Med 2014 [12]              | 61.9           | 68           | 59             | 54         | 1,410                    | 46.2                    | 150 mL | 27                | NA                      |
| Maltais F, et al. Ther Adv Respir Dis 2014<br>(Study 417) | 61.6           | 56.1         | 63.2           | 28.2       | NA                       | 51.3                    | 12.6%  | 34.5              | NA                      |
| Maltais F, et al. Ther Adv Respir Dis 2014<br>(Study 418) | 62.6           | 54.7         | 60.6           | 39.4       | NA                       | 51.3                    | 16.2%  | 38.9              | NA                      |
| Zheng J, et al. Int J COPD 2015                           | 64.0           | 94.0         | 29.0           | 56.0       | 1,131                    | NA                      | NA     | 44                | NA                      |
| Siler TN, et al. Int J COPD 2016                          | 64.1           | 58.0         | 55.0           | 45.0       | NA                       | 46.5                    | 11.5%  | 22                | NA                      |



|                                       | Age     | Males | Smokers | ICS | FEV <sub>1</sub> | FEV <sub>1</sub> | BDT    | Reversible | Exacerb $\geq 2$ |
|---------------------------------------|---------|-------|---------|-----|------------------|------------------|--------|------------|------------------|
|                                       | (years) | (%)   | (%)     | (%) | (mL)             | (%)              |        | (%)        | (%)              |
| O'Donnell D, et al. ATS Congress 2015 | 61.2    | 70.0  | NA      | NA  | 1,728            | 57.7             | 168 mL | NA         | NA               |
| MORACTO 2                             |         |       |         |     |                  |                  |        |            |                  |

Abbreviations: APRS, Asian-Pacific Respiratory Society; BDT, bronchodilator response to one short-acting  $\beta$ -agonist; FEV<sub>1</sub>, forced expiratory volume in the first second; ICS, inhaled steroids use at baseline; NA, not available.

<sup>a</sup>Data referred to the active treatment arm with the commercialized dose in Europe of the double bronchodilator arm, except for the studies with a cross-over design that is referred to the complete cohort.



## References

1. Bateman ED, Ferguson GT, Barnes N, Gallagher N, Green Y, Henley M, et al. Dual bronchodilation with QVA149 versus single bronchodilator therapy: the SHINE study. *The European respiratory journal : official journal of the European Society for Clinical Respiratory Physiology*. 2013;42(6):1484-94. doi: 10.1183/09031936.00200212. PubMed PMID: 23722616; PubMed Central PMCID: PMC3844137.
2. Dahl R, Chapman KR, Rudolf M, Mehta R, Kho P, Alagappan VK, et al. Safety and efficacy of dual bronchodilation with QVA149 in COPD patients: the ENLIGHTEN study. *Respiratory medicine*. 2013;107(10):1558-67. doi: 10.1016/j.rmed.2013.05.016. PubMed PMID: 23867808.
3. Mahler DA, Decramer M, D'Urzo A, Worth H, White T, Alagappan VK, et al. Dual bronchodilation with QVA149 reduces patient-reported dyspnoea in COPD: the BLAZE study. *The European respiratory journal : official journal of the European Society for Clinical Respiratory Physiology*. 2014;43(6):1599-609. doi: 10.1183/09031936.00124013. PubMed PMID: 24176997.
4. Wedzicha JA, Decramer M, Ficker JH, Niewoehner DE, Sandstrom T, Taylor AF, et al. Analysis of chronic obstructive pulmonary disease exacerbations with the dual bronchodilator QVA149 compared with glycopyrronium and tiotropium (SPARK): a randomised, double-blind, parallel-group study. *The lancet Respiratory medicine*. 2013;1(3):199-209. doi: 10.1016/S2213-2600(13)70052-3. PubMed PMID: 24429126.
5. Beeh KM, Korn S, Beier J, Jadayel D, Henley M, D'Andrea P, et al. Effect of QVA149 on lung volumes and exercise tolerance in COPD patients: the BRIGHT study. *Respiratory medicine*. 2014;108(4):584-92. doi: 10.1016/j.rmed.2014.01.006. PubMed PMID: 24534204.
6. Watz H, Mailander C, Baier M, Kirsten A. Effects of indacaterol/glycopyrronium (QVA149) on lung hyperinflation and physical activity in patients with moderate to severe COPD: a randomised, placebo-controlled, crossover study (The MOVE Study). *BMC pulmonary medicine*. 2016;16(1):95. doi: 10.1186/s12890-016-0256-7. PubMed PMID: 27301417; PubMed Central PMCID: PMC4908762.
7. D'Urzo AD, Rennard SI, Kerwin EM, Mergel V, Leselbaum AR, Caracta CF, et al. Efficacy and safety of fixed-dose combinations of aclidinium bromide/formoterol fumarate: the 24-week, randomized, placebo-controlled AUGMENT COPD study. *Respiratory research*. 2014;15:123. doi: 10.1186/s12931-014-0123-0. PubMed PMID: 25756831; PubMed Central PMCID: PMC4213545.
8. Singh D, Jones PW, Bateman ED, Korn S, Serra C, Molins E, et al. Efficacy and safety of aclidinium bromide/formoterol fumarate fixed-dose combinations compared with individual components and placebo in patients with COPD (ACLIFORM-COPD): a multicentre, randomised study. *BMC pulmonary medicine*. 2014;14:178. doi: 10.1186/1471-2466-14-178. PubMed PMID: 25404569; PubMed Central PMCID: PMC4273456.
9. Bateman ED, Chapman KR, Singh D, D'Urzo AD, Molins E, Leselbaum A, et al. Aclidinium bromide and formoterol fumarate as a fixed-dose combination in COPD: pooled analysis of symptoms and exacerbations from two six-month, multicentre, randomised studies (ACLIFORM and AUGMENT). *Respiratory research*. 2015;16:92. doi: 10.1186/s12931-015-0250-2. PubMed PMID: 26233481; PubMed Central PMCID: PMC4531806.
10. Donohue JF, Soong W, Wu X, Shrestha P, Lei A. Long-term safety of aclidinium bromide/formoterol fumarate fixed-dose combination: Results of a randomized 1-year trial

in patients with COPD. *Respiratory medicine*. 2016;116:41-8. doi: 10.1016/j.rmed.2016.05.007. PubMed PMID: 27296819.

11. Donohue JF, Maleki-Yazdi MR, Kilbride S, Mehta R, Kalberg C, Church A. Efficacy and safety of once-daily umeclidinium/vilanterol 62.5/25 mcg in COPD. *Respiratory medicine*. 2013;107(10):1538-46. doi: 10.1016/j.rmed.2013.06.001. PubMed PMID: 23830094.

12. Maleki-Yazdi MR, Kaelin T, Richard N, Zvarich M, Church A. Efficacy and safety of umeclidinium/vilanterol 62.5/25 mcg and tiotropium 18 mcg in chronic obstructive pulmonary disease: results of a 24-week, randomized, controlled trial. *Respiratory medicine*. 2014;108(12):1752-60. Epub 2014/12/03. doi: 10.1016/j.rmed.2014.10.002. PubMed PMID: 25458157.
